# Supplementary material for: Impact of swab removal in the detection of SARS-CoV-2 weakly-positive specimens
Source: PubMed Central journal article supplement (PMC10765045; doi:10.1099/acmi.0.000718.v3), 2023-12-12
Supplement: acmi-5-718.v3-s001.pdf [file acmi-5-718.v3-s001.pdf]

## Annex Swab Paper

*Table S1: Paired Ct and CN values for samples (S) and controls (C) in the ABI and Alinity platforms*

| sample_id | swab_status | Ct_average | result   | platform |
|-----------|-------------|------------|----------|----------|
| S10D1     | Swab_in     | 32.2745    | positive | ABI      |
| S10D1     | Swab_out    | 32.66615   | positive | ABI      |
| S10D2     | Swab_in     | 35.6901    | positive | ABI      |
| S10D2     | Swab_out    | 36.36565   | positive | ABI      |
| S10D3     | Swab_in     | 38.56985   | positive | ABI      |
| S10D3     | Swab_out    |            | negative | ABI      |
| S10D4     | Swab_in     |            | negative | ABI      |
| S10D4     | Swab_out    |            | negative | ABI      |
| S10D5     | Swab_in     |            | negative | ABI      |
| S10D5     | Swab_out    |            | negative | ABI      |
| S10D6     | Swab_in     |            | negative | ABI      |
| S10D6     | Swab_out    |            | negative | ABI      |
| S1D1      | Swab_in     | 28.75755   | positive | ABI      |
| S1D1      | Swab_out    | 29.81525   | positive | ABI      |
| S1D2      | Swab_in     | 32.5157    | positive | ABI      |
| S1D2      | Swab_out    | 33.4679    | positive | ABI      |
| S1D3      | Swab_in     | 35.4992    | positive | ABI      |
| S1D3      | Swab_out    | 36.8991    | positive | ABI      |
| S1D4      | Swab_in     |            | negative | ABI      |
| S1D4      | Swab_out    |            | negative | ABI      |
| S1D5      | Swab_in     |            | negative | ABI      |
| S1D5      | Swab_out    |            | negative | ABI      |
| S1D6      | Swab_in     |            | negative | ABI      |
| S1D6      | Swab_out    |            | negative | ABI      |
| S2D1      | Swab_in     | 29.428     | positive | ABI      |
| S2D1      | Swab_out    | 30.01295   | positive | ABI      |
| S2D2      | Swab_in     | 33.14045   | positive | ABI      |
| S2D2      | Swab_out    | 35.45635   | positive | ABI      |
| S2D3      | Swab_in     | 36.5602    | positive | ABI      |
| S2D3      | Swab_out    | 37.02375   | positive | ABI      |
| S2D4      | Swab_in     | 37.5758    | positive | ABI      |
| S2D4      | Swab_out    |            | negative | ABI      |

| sample_id | swab_status | CN_average | result   | platform |
|-----------|-------------|------------|----------|----------|
| S10D1     | Swab_in     | 29.72      | positive | Alinity  |
| S10D1     | Swab_out    | 33.06      | positive | Alinity  |
| S10D2     | Swab_in     | 33.635     | positive | Alinity  |
| S10D2     | Swab_out    |            | negative | Alinity  |
| S10D3     | Swab_in     | 36.815     | positive | Alinity  |
| S10D3     | Swab_out    | 36.93      | positive | Alinity  |
| S10D4     | Swab_in     |            | negative | Alinity  |
| S10D4     | Swab_out    |            | negative | Alinity  |
| S10D5     | Swab_in     |            | negative | Alinity  |
| S10D5     | Swab_out    |            | negative | Alinity  |
| S10D6     | Swab_in     |            | negative | Alinity  |
| S10D6     | Swab_out    |            | negative | Alinity  |
| S1D1      | Swab_in     | 26.45      | positive | Alinity  |
| S1D1      | Swab_out    | 27.205     | positive | Alinity  |
| S1D2      | Swab_in     | 29.45      | positive | Alinity  |
| S1D2      | Swab_out    | 30.715     | positive | Alinity  |
| S1D3      | Swab_in     | 33.4       | positive | Alinity  |
| S1D3      | Swab_out    | 33.75      | positive | Alinity  |
| S1D4      | Swab_in     | 36.78      | positive | Alinity  |
| S1D4      | Swab_out    | 38.38      | positive | Alinity  |
| S1D5      | Swab_in     |            | negative | Alinity  |
| S1D5      | Swab_out    |            | negative | Alinity  |
| S1D6      | Swab_in     |            | negative | Alinity  |
| S1D6      | Swab_out    |            | negative | Alinity  |
| S2D1      | Swab_in     | 25.99      | positive | Alinity  |
| S2D1      | Swab_out    | 26.56      | positive | Alinity  |
| S2D2      | Swab_in     | 29.695     | positive | Alinity  |
| S2D2      | Swab_out    | 29.985     | positive | Alinity  |
| S2D3      | Swab_in     | 32.935     | positive | Alinity  |
| S2D3      | Swab_out    | 33.515     | positive | Alinity  |
| S2D4      | Swab_in     | 37.565     | positive | Alinity  |
| S2D4      | Swab_out    | 37.585     | positive | Alinity  |

|      |          |          |          |     |
|------|----------|----------|----------|-----|
| S2D5 | Swab_in  |          | negative | ABI |
| S2D5 | Swab_out |          | negative | ABI |
| S2D6 | Swab_in  |          | negative | ABI |
| S2D6 | Swab_out |          | negative | ABI |
| S3D1 | Swab_in  | 32.07605 | positive | ABI |
| S3D1 | Swab_out | 32.1414  | positive | ABI |
| S3D2 | Swab_out | 35.18175 | positive | ABI |
| S3D2 | Swab_in  | 36.5025  | positive | ABI |
| S3D3 | Swab_out | 36.4844  | positive | ABI |
| S3D3 | Swab_in  |          | negative | ABI |
| S3D4 | Swab_in  |          | negative | ABI |
| S3D4 | Swab_out |          | negative | ABI |
| S3D5 | Swab_in  |          | negative | ABI |
| S3D5 | Swab_out |          | negative | ABI |
| S3D6 | Swab_in  |          | negative | ABI |
| S3D6 | Swab_out |          | negative | ABI |
| S4D1 | Swab_in  | 28.4386  | positive | ABI |
| S4D1 | Swab_out | 28.72945 | positive | ABI |
| S4D2 | Swab_out | 32.2191  | positive | ABI |
| S4D2 | Swab_in  | 32.6     | positive | ABI |
| S4D3 | Swab_in  | 35.4802  | positive | ABI |
| S4D3 | Swab_out | 36.10315 | positive | ABI |
| S4D4 | Swab_in  | 38.1931  | positive | ABI |
| S4D4 | Swab_out |          | negative | ABI |
| S4D5 | Swab_in  |          | negative | ABI |
| S4D5 | Swab_out |          | negative | ABI |
| S4D6 | Swab_in  |          | negative | ABI |
| S4D6 | Swab_out |          | negative | ABI |
| S5D1 | Swab_out | 25.27315 | positive | ABI |
| S5D1 | Swab_in  | 25.41595 | positive | ABI |
| S5D2 | Swab_out | 28.8412  | positive | ABI |
| S5D2 | Swab_in  | 28.91475 | positive | ABI |
| S5D3 | Swab_out | 31.9235  | positive | ABI |
| S5D3 | Swab_in  | 32.8178  | positive | ABI |
| S5D4 | Swab_in  | 36.23615 | positive | ABI |
| S5D4 | Swab_out | 36.51545 | positive | ABI |
| S5D5 | Swab_in  | 39.4948  | positive | ABI |
| S5D5 | Swab_out |          | negative | ABI |
| S5D6 | Swab_in  |          | negative | ABI |

|      |          |        |          |         |
|------|----------|--------|----------|---------|
| S2D5 | Swab_in  | 38.72  | positive | Alinity |
| S2D5 | Swab_out |        | negative | Alinity |
| S2D6 | Swab_in  |        | negative | Alinity |
| S2D6 | Swab_out |        | negative | Alinity |
| S3D1 | Swab_in  | 27.165 | positive | Alinity |
| S3D1 | Swab_out | 29.59  | positive | Alinity |
| S3D2 | Swab_in  | 30.57  | positive | Alinity |
| S3D2 | Swab_out | 32.705 | positive | Alinity |
| S3D3 | Swab_in  | 35.105 | positive | Alinity |
| S3D3 | Swab_out | 36.575 | positive | Alinity |
| S3D4 | Swab_in  | 38.805 | positive | Alinity |
| S3D4 | Swab_out |        | negative | Alinity |
| S3D5 | Swab_in  |        | negative | Alinity |
| S3D5 | Swab_out |        | negative | Alinity |
| S3D6 | Swab_in  |        | negative | Alinity |
| S3D6 | Swab_out |        | negative | Alinity |
| S4D1 | Swab_in  | 23.925 | positive | Alinity |
| S4D1 | Swab_out | 25.47  | positive | Alinity |
| S4D2 | Swab_in  | 27.48  | positive | Alinity |
| S4D2 | Swab_out | 29.355 | positive | Alinity |
| S4D3 | Swab_in  | 30.73  | positive | Alinity |
| S4D3 | Swab_out | 32.035 | positive | Alinity |
| S4D4 | Swab_in  | 34.06  | positive | Alinity |
| S4D4 | Swab_out | 36.27  | positive | Alinity |
| S4D5 | Swab_in  | 36.445 | positive | Alinity |
| S4D5 | Swab_out | 38.765 | positive | Alinity |
| S4D6 | Swab_in  |        | negative | Alinity |
| S4D6 | Swab_out |        | negative | Alinity |
| S5D1 | Swab_in  | 21.855 | positive | Alinity |
| S5D1 | Swab_out | 21.935 | positive | Alinity |
| S5D2 | Swab_out | 25.375 | positive | Alinity |
| S5D2 | Swab_in  | 25.76  | positive | Alinity |
| S5D3 | Swab_out | 28.95  | positive | Alinity |
| S5D3 | Swab_in  | 29.47  | positive | Alinity |
| S5D4 | Swab_in  | 32.395 | positive | Alinity |
| S5D4 | Swab_out | 32.71  | positive | Alinity |
| S5D5 | Swab_in  | 35.585 | positive | Alinity |
| S5D5 | Swab_out | 35.915 | positive | Alinity |
| S5D6 | Swab_out | 39.42  | positive | Alinity |

|      |          |          |          |     |
|------|----------|----------|----------|-----|
| S5D6 | Swab_out |          | negative | ABI |
| S6D1 | Swab_out | 30.45425 | positive | ABI |
| S6D1 | Swab_in  | 31.14705 | positive | ABI |
| S6D2 | Swab_out | 35.22445 | positive | ABI |
| S6D2 | Swab_in  | 35.50715 | positive | ABI |
| S6D3 | Swab_out | 37.7775  | positive | ABI |
| S6D3 | Swab_in  | 39.57    | positive | ABI |
| S6D4 | Swab_in  |          | negative | ABI |
| S6D4 | Swab_out |          | negative | ABI |
| S6D5 | Swab_in  |          | negative | ABI |
| S6D5 | Swab_out |          | negative | ABI |
| S6D6 | Swab_in  |          | negative | ABI |
| S6D6 | Swab_out |          | negative | ABI |
| S8D1 | Swab_in  | 35.82885 | positive | ABI |
| S8D1 | Swab_out | 36.174   | positive | ABI |
| S8D2 | Swab_in  | 35.0119  | positive | ABI |
| S8D2 | Swab_out |          | negative | ABI |
| S8D3 | Swab_in  |          | negative | ABI |
| S8D3 | Swab_out |          | negative | ABI |
| S8D4 | Swab_in  |          | negative | ABI |
| S8D4 | Swab_out |          | negative | ABI |
| S8D5 | Swab_in  |          | negative | ABI |
| S8D5 | Swab_out |          | negative | ABI |
| S8D6 | Swab_in  |          | negative | ABI |
| S8D6 | Swab_out |          | negative | ABI |
| S9D1 | Swab_in  | 27.1921  | positive | ABI |
| S9D1 | Swab_out | 28.04645 | positive | ABI |
| S9D2 | Swab_in  | 30.60165 | positive | ABI |
| S9D2 | Swab_out | 31.8407  | positive | ABI |
| S9D3 | Swab_in  | 34.3881  | positive | ABI |
| S9D3 | Swab_out | 35.03785 | positive | ABI |
| S9D4 | Swab_in  | 37.4859  | positive | ABI |
| S9D4 | Swab_out | 38.25325 | positive | ABI |
| S9D5 | Swab_in  |          | negative | ABI |
| S9D5 | Swab_out |          | negative | ABI |
| S9D6 | Swab_in  |          | negative | ABI |
| S9D6 | Swab_out |          | negative | ABI |
| C1D1 | Swab_in  |          | negative | ABI |
| C1D1 | Swab_out |          | negative | ABI |

|      |          |        |          |         |
|------|----------|--------|----------|---------|
| S5D6 | Swab_in  |        | negative | Alinity |
| S6D1 | Swab_out | 27.295 | positive | Alinity |
| S6D1 | Swab_in  | 27.725 | positive | Alinity |
| S6D2 | Swab_out | 31.005 | positive | Alinity |
| S6D2 | Swab_in  | 31.345 | positive | Alinity |
| S6D3 | Swab_out | 33.94  | positive | Alinity |
| S6D3 | Swab_in  | 34.67  | positive | Alinity |
| S6D4 | Swab_in  | 38.285 | positive | Alinity |
| S6D4 | Swab_out |        | negative | Alinity |
| S6D5 | Swab_in  |        | negative | Alinity |
| S6D5 | Swab_out |        | negative | Alinity |
| S6D6 | Swab_in  |        | negative | Alinity |
| S6D6 | Swab_out |        | negative | Alinity |
| S8D1 | Swab_in  | 32.125 | positive | Alinity |
| S8D1 | Swab_out | 32.58  | positive | Alinity |
| S8D2 | Swab_in  | 35.3   | positive | Alinity |
| S8D2 | Swab_out |        | negative | Alinity |
| S8D3 | Swab_in  | 39.63  | positive | Alinity |
| S8D3 | Swab_out |        | negative | Alinity |
| S8D4 | Swab_in  |        | negative | Alinity |
| S8D4 | Swab_out |        | negative | Alinity |
| S8D5 | Swab_in  |        | negative | Alinity |
| S8D5 | Swab_out |        | negative | Alinity |
| S8D6 | Swab_in  |        | negative | Alinity |
| S8D6 | Swab_out |        | negative | Alinity |
| S9D1 | Swab_in  | 24.29  | positive | Alinity |
| S9D1 | Swab_out | 26.49  | positive | Alinity |
| S9D2 | Swab_in  | 28.755 | positive | Alinity |
| S9D2 | Swab_out | 29.87  | positive | Alinity |
| S9D3 | Swab_in  | 31.85  | positive | Alinity |
| S9D3 | Swab_out | 35.045 | positive | Alinity |
| S9D4 | Swab_in  | 35.415 | positive | Alinity |
| S9D4 | Swab_out | 40.83  | positive | Alinity |
| S9D5 | Swab_in  | 38.075 | positive | Alinity |
| S9D5 | Swab_out |        | negative | Alinity |
| S9D6 | Swab_in  |        | negative | Alinity |
| S9D6 | Swab_out |        | negative | Alinity |
| C1D1 | Swab_in  |        | negative | Alinity |
| C1D1 | Swab_out |        | negative | Alinity |

|      |          |  |          |     |
|------|----------|--|----------|-----|
| C1D2 | Swab_in  |  | negative | ABI |
| C1D2 | Swab_out |  | negative | ABI |
| C1D3 | Swab_in  |  | negative | ABI |
| C1D3 | Swab_out |  | negative | ABI |
| C1D4 | Swab_in  |  | negative | ABI |
| C1D4 | Swab_out |  | negative | ABI |
| C1D5 | Swab_in  |  | negative | ABI |
| C1D5 | Swab_out |  | negative | ABI |
| C1D6 | Swab_in  |  | negative | ABI |
| C1D6 | Swab_out |  | negative | ABI |
| C2D1 | Swab_in  |  | negative | ABI |
| C2D1 | Swab_out |  | negative | ABI |
| C2D2 | Swab_in  |  | negative | ABI |
| C2D2 | Swab_out |  | negative | ABI |
| C2D3 | Swab_in  |  | negative | ABI |
| C2D3 | Swab_out |  | negative | ABI |
| C2D4 | Swab_in  |  | negative | ABI |
| C2D4 | Swab_out |  | negative | ABI |
| C2D5 | Swab_in  |  | negative | ABI |
| C2D5 | Swab_out |  | negative | ABI |
| C2D6 | Swab_in  |  | negative | ABI |
| C2D6 | Swab_out |  | negative | ABI |

|      |          |  |          |         |
|------|----------|--|----------|---------|
| C1D2 | Swab_in  |  | negative | Alinity |
| C1D2 | Swab_out |  | negative | Alinity |
| C1D3 | Swab_in  |  | negative | Alinity |
| C1D3 | Swab_out |  | negative | Alinity |
| C1D4 | Swab_in  |  | negative | Alinity |
| C1D4 | Swab_out |  | negative | Alinity |
| C1D5 | Swab_in  |  | negative | Alinity |
| C1D5 | Swab_out |  | negative | Alinity |
| C1D6 | Swab_in  |  | negative | Alinity |
| C1D6 | Swab_out |  | negative | Alinity |
| C2D1 | Swab_in  |  | negative | Alinity |
| C2D1 | Swab_out |  | negative | Alinity |
| C2D2 | Swab_in  |  | negative | Alinity |
| C2D2 | Swab_out |  | negative | Alinity |
| C2D3 | Swab_in  |  | negative | Alinity |
| C2D3 | Swab_out |  | negative | Alinity |
| C2D4 | Swab_in  |  | negative | Alinity |
| C2D4 | Swab_out |  | negative | Alinity |
| C2D5 | Swab_in  |  | negative | Alinity |
| C2D5 | Swab_out |  | negative | Alinity |
| C2D6 | Swab_in  |  | negative | Alinity |
| C2D6 | Swab_out |  | negative | Alinity |

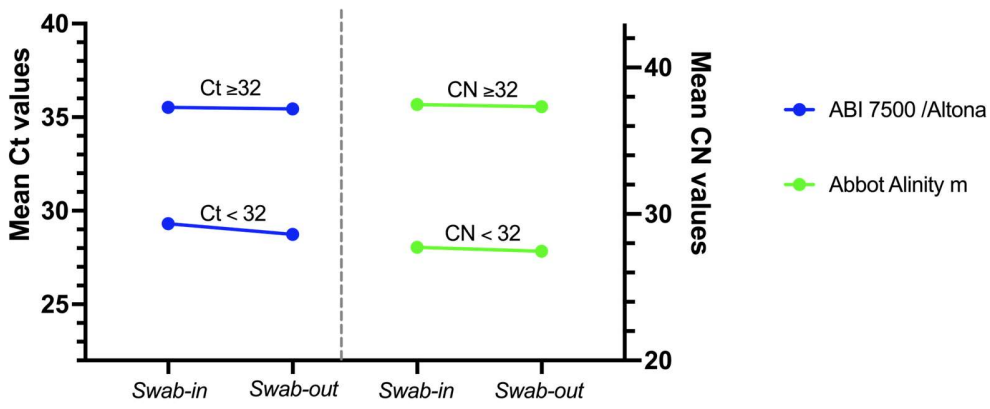

Figure S1: Comparison of Ct mean values before and after swab removal for the moderate-high Ct (<32) and high Ct groups (≥32).

Table S2: Paired t-test results comparing the mean Ct values for each group and platform

| Platform | Group  | p value | CI 95%           | Mean diff |
|----------|--------|---------|------------------|-----------|
| Alinity  | All    | 0.8689  | 3.2129 - 3.7673  | 0.2772    |
| Alinity  | CN <32 | 0.5268  | 2.8932 - 1.5541  | -0.6696   |
| Alinity  | CN ≥32 | 0.9631  | -1.5493 - 1.6201 | 0.035277  |
| ABI      | All    | 0.3437  | -3.8388 - 1.4576 | -0.7782   |
| ABI      | Ct <32 | 0.5441  | 1.5532 - 2.7003  | 0.557     |
| ABI      | Ct ≥32 | 0.6893  | -1.2016 - 0.8145 | -0.01936  |

Table S3: Contingency tables for each group and platform

| <b>Alinity - Overall Results</b> |          |                |          |       |
|----------------------------------|----------|----------------|----------|-------|
|                                  |          | Swab in method |          | Total |
|                                  |          | Positive       | Negative |       |
| Swab Out method                  | Positive | 31             | 1        | 32    |
|                                  | Negative | 7              | 27       | 34    |
|                                  | Total    | 38             | 28       | 66    |

| <b>Altona/ABI - Overall Results</b> |          |                |          |       |
|-------------------------------------|----------|----------------|----------|-------|
|                                     |          | Swab in method |          | Total |
|                                     |          | Positive       | Negative |       |
| Swab Out method                     | Positive | 25             | 1        | 26    |
|                                     | Negative | 5              | 35       | 40    |
|                                     | Total    | 30             | 36       | 66    |

| <b>Alinity - CN &lt;32 group</b> |          |                |          |       |
|----------------------------------|----------|----------------|----------|-------|
|                                  |          | Swab in method |          | Total |
|                                  |          | Positive       | Negative |       |
| Swab Out method                  | Positive | 18             | 0        | 18    |
|                                  | Negative | 0              | 27       | 27    |
|                                  | Total    | 18             | 27       | 45    |

| <b>Altona/ABI - Ct &lt;32 group</b> |          |                |          |       |
|-------------------------------------|----------|----------------|----------|-------|
|                                     |          | Swab in method |          | Total |
|                                     |          | Positive       | Negative |       |
| Swab Out method                     | Positive | 8              | 0        | 8     |
|                                     | Negative | 0              | 35       | 35    |
|                                     | Total    | 8              | 35       | 43    |

| <b>Alinity - CN ≥32 group</b> |          |                |          |       |
|-------------------------------|----------|----------------|----------|-------|
|                               |          | Swab in method |          | Total |
|                               |          | Positive       | Negative |       |
| Swab Out method               | Positive | 13             | 1        | 14    |
|                               | Negative | 7              | 27       | 34    |
|                               | Total    | 20             | 28       | 48    |

| <b>Altona/ABI - Ct ≥32 group</b> |          |                |          |       |
|----------------------------------|----------|----------------|----------|-------|
|                                  |          | Swab in method |          | Total |
|                                  |          | Positive       | Negative |       |
| Swab Out method                  | Positive | 17             | 1        | 18    |
|                                  | Negative | 5              | 35       | 40    |
|                                  | Total    | 22             | 36       | 58    |

Some samples were not detected in the swab-in method but were captured after removing the swab, but the results should be interpreted cautiously. Our data analysis strategy considered samples positive only when both replicates were detected. For instance, sample S5D6 was considered negative in the Alinity because only one replicate was captured in the swab-in method,

which had a very high CN value of CN 40.78. The corresponding swab-out pair samples were detected, with CNs of 40.69 and 38.15. The set was considered positive since these two samples from the swab-out method were detected.

Similarly, sample S3D3 in the SARS-Cov-2 Altona/ABI assay had a single Ct of 39.05 for the swab-in method but two values of Ct 38.54 and 38.37 after removing the swab. Boxplot figures comparing the distribution of samples and a table detailing the complete statistics can be found in the supplementary materials (**Figure S2, Table S4**).

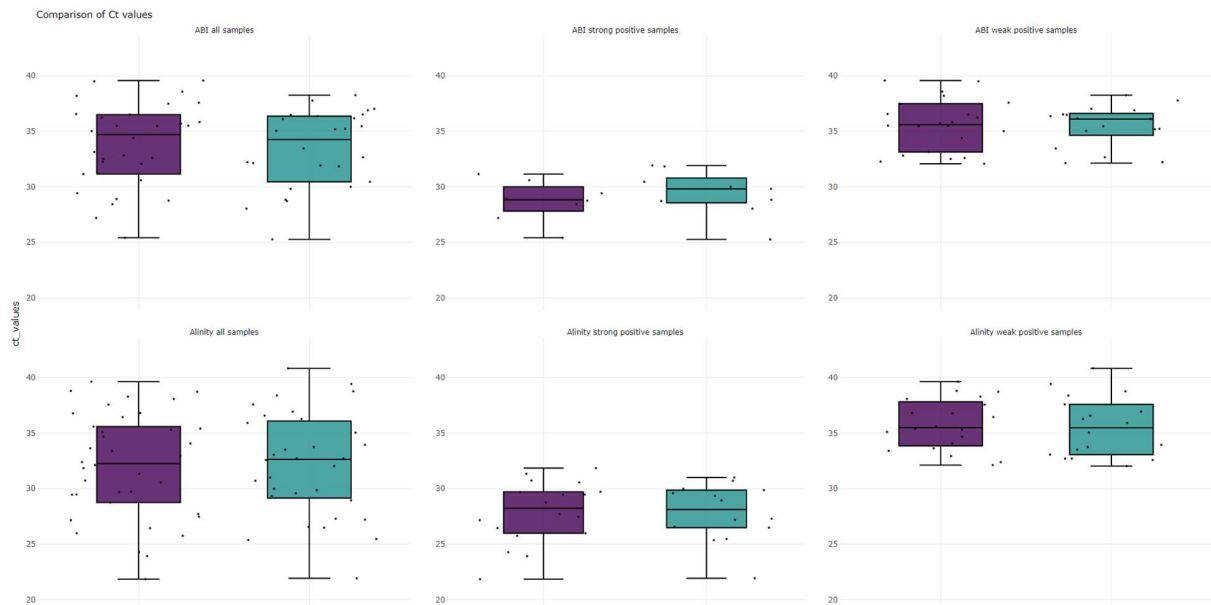

*Figure S2: Comparison of Ct mean values before and after swab removal for the moderate-high Ct and high Ct groups.*



Table S4: Summary statistics for all groups, conditions and platforms.

| Method   | Platform | Group  | Min   | Max   | Median | Mean  | 1st Qu. | 3rd Qu. |
|----------|----------|--------|-------|-------|--------|-------|---------|---------|
| Swab in  | Alinity  | All    | 21.93 | 40.83 | 32.64  | 32.18 | 28.93   | 35.54   |
| Swab out | Alinity  | All    | 28.93 | 39.63 | 32.26  | 32.05 | 29.25   | 36.00   |
| Swab in  | Alinity  | CN <32 | 21.86 | 31.85 | 28.24  | 28.05 | 26.11   | 29.71   |
| Swab out | Alinity  | CN <32 | 21.93 | 31.00 | 28.12  | 27.84 | 26.51   | 29.80   |
| Swab in  | Alinity  | CN ≥32 | 35.05 | 40.83 | 37.26  | 37.57 | 36.35   | 40.83   |
| Swab out | Alinity  | CN ≥32 | 35.10 | 39.63 | 36.61  | 36.69 | 35.46   | 37.38   |
| Swab in  | ABI      | All    | 25.27 | 38.25 | 34.25  | 33.38 | 31.38   | 36.44   |
| Swab out | ABI      | All    | 25.42 | 39.57 | 34.7   | 33.46 | 30.80   | 36.32   |
| Swab in  | ABI      | Ct <32 | 25.27 | 31.92 | 29.33  | 29.31 | 28.13   | 29.72   |
| Swab out | ABI      | Ct <32 | 25.42 | 31.15 | 28.84  | 28.74 | 28.56   | 30.80   |
| Swab in  | ABI      | Ct ≥32 | 32.14 | 38.25 | 35.47  | 36.52 | 35.04   | 36.56   |
| Swab out | ABI      | Ct ≥32 | 32.08 | 39.49 | 35.69  | 35.44 | 35.04   | 36.52   |
